# Supplementary material
Source: Springer Nature journal article supplement (https://www.springermedizin.de/resource/supplementary/13049_2014_757_MOESM2_ESM.pdf/9667228)

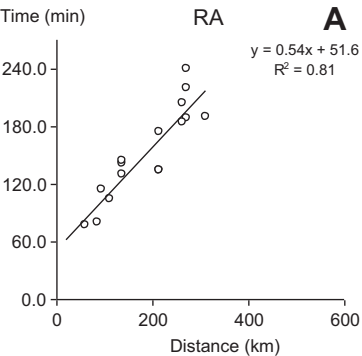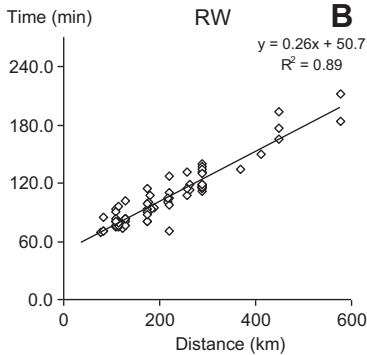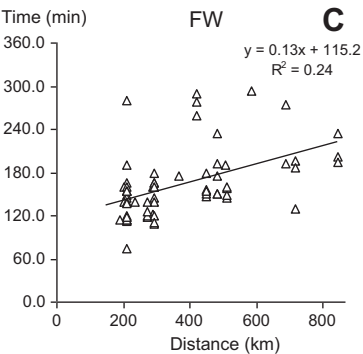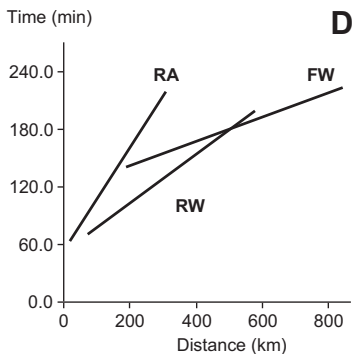

Supplement: MOESM2 [file 9667228]
